# Supplementary material for: The CsSTE50 Adaptor Protein in Mitogen-Activated Protein Kinase Cascades Is Essential for Pepper Anthracnose Disease of Colletotrichum scovillei
Source: PubMed Central journal article supplement — Plant Pathol J. 2022 Dec 1;38(6):593–602. doi: 10.5423/PPJ.OA.06.2022.0074 (PMC9742795; doi:10.5423/ppj.oa.06.2022.0074), 2022-12-01
Supplement: PPJ-OA-06-2022-0074-suppl.pdf [file PPJ-OA-06-2022-0074-suppl.pdf]

**Supplementary Table 1.** Primers used in this study

| Name                            | Primer sequence 5' to 3'                             |
|---------------------------------|------------------------------------------------------|
| <i>CsSTE50</i> knock-out        |                                                      |
| CsSTE50_5F                      | CGGCATCTGCATGTCACTA                                  |
| CsSTE50_5R                      | <u>CCTCCACTAGCTCCAGCCAAGCCTGACGGAGGAGAGGAGAAG</u>    |
| CsSTE50_3F                      | <u>GTTGGTGTTCGATGTCAGCTCCGGAGTTCCCGTCCGATTGTTGAG</u> |
| CsSTE50_3R                      | AGCTACAGATGACGCAAGAAC                                |
| CsSTE50_NF                      | TTACCTCAACTCGGTTCGTCTA                               |
| CsSTE50_NR                      | GTCCGTTCCACCATAAGGAAA                                |
| CsSTE50_SF                      | CCTCCTCTCCTATTCTCGACTC                               |
| CsSTE50_SR                      | TCCGCGACAGTATTCCAAAG                                 |
| CsSTE50_PF                      | GGAGTAGAGCAAGGTGATTGTT                               |
| CsSTE50_PR                      | CATGTGCGTCACTTCCCTTA                                 |
| CsSTE50_RTF                     | TTCAGACGGCTGAGGGA                                    |
| CsSTE50_RTR                     | GGATGGATAACCGGGAGATGTA                               |
| CsSTE50_cmF                     | ATTGGATGTCGTGGATGTCG                                 |
| CsSTE50_cmR                     | AGACCACACCCTGTCCTAATA                                |
| Hygromycin B phosphotransferase |                                                      |
| HPH_R                           | GGCTTGGCTGGAGCTAGTGGAGG                              |
| HPH_R                           | CTCCGGAGCTGACATCGACACCAAC                            |
